# Supplementary material
Source: ML conference proceedings conference paper supplement (https://openreview.net/forum?id=6yQL13G6Aa)
Supplement: supplementary_material [file 2qus_A_1.R2R.sto.pdf › supplemental_material/2qus_A/R-scape/2qus_A_1.R2R.sto.pdf]

2qus\_A\_1

5 - ○○○○GCCUGUCACCGGAUGUGCUUUCCGGUGAGGACAAAAGGGC○○○○○○○○
