# Supplementary material
Source: ML conference proceedings conference paper supplement (https://openreview.net/forum?id=6yQL13G6Aa)
Supplement: supplementary_material [file 5ddp_A_1.R2R.sto.pdf › supplemental_material/5ddp_A/R-scape/5ddp_A_1.R2R.sto.pdf]

5ddp\_A\_1

5-CGUUGACCCAGGAACUGGGCGGAAGUAAGGUCCAUUGCAACUCGGGCGCUGAAGCAACGC○
