# Supplementary material
Source: ML conference proceedings conference paper supplement (https://openreview.net/forum?id=6yQL13G6Aa)
Supplement: supplementary_material [file 6ahr_A_1.R2R.sto.pdf › supplemental_material/6ahr_A/R-scape/6ahr_A_1.R2R.sto.pdf]

6ahr A 1
