# Supplementary material
Source: ML conference proceedings conference paper supplement (https://openreview.net/forum?id=6yQL13G6Aa)

2qus\_A\_1.cacofold

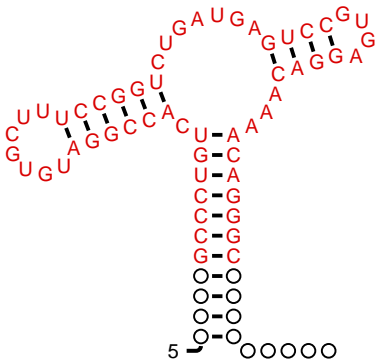

Supplement: supplementary_material [file 2qus_A_1.cacofold.R2R.sto.pdf › supplemental_material/2qus_A/R-scape/2qus_A_1.cacofold.R2R.sto.pdf]

RF00008\_4\_59\_1

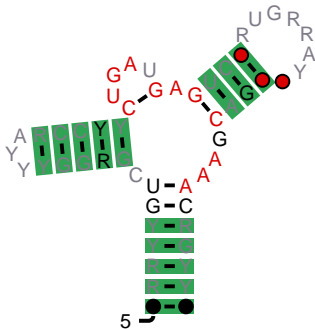

Supplement: supplementary_material [file RF00008_4_59_1.R2R.sto.pdf › supplemental_material/2qus_A/R-scape/RF00008_4_59_1.R2R.sto.pdf]

RF00008\_4\_59\_1.cacofold

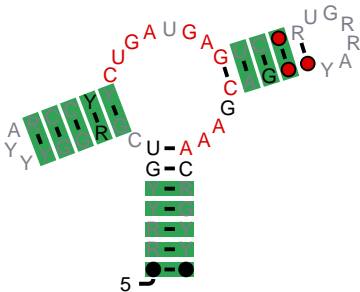

Supplement: supplementary_material [file RF00008_4_59_1.cacofold.R2R.sto.pdf › supplemental_material/2qus_A/R-scape/RF00008_4_59_1.cacofold.R2R.sto.pdf]

# RF00008\_Hammerhead\_3

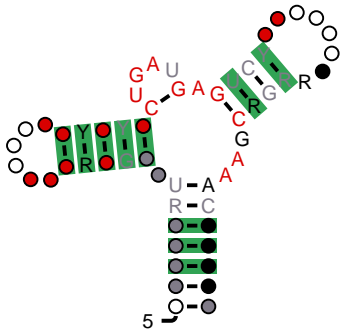

Supplement: supplementary_material [file RF00008_Hammerhead_3.R2R.sto.pdf › supplemental_material/2qus_A/R-scape/RF00008_Hammerhead_3.R2R.sto.pdf]

# RF00008\_Hammerhead\_3.cacofold

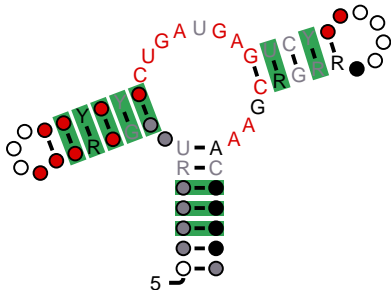

Supplement: supplementary_material [file RF00008_Hammerhead_3.cacofold.R2R.sto.pdf › supplemental_material/2qus_A/R-scape/RF00008_Hammerhead_3.cacofold.R2R.sto.pdf]

2xnw\_A\_1

5 -   CAUAUAAYYGCGUGR●●AURGCACGCARGUUCUACCGGRCACYG●●A●●GUCCGAYUAUG

Supplement: supplementary_material [file 2xnw_A_1.R2R.sto.pdf › supplemental_material/2xnw_A/R-scape/2xnw_A_1.R2R.sto.pdf]

2xnw\_A\_1.cacofold

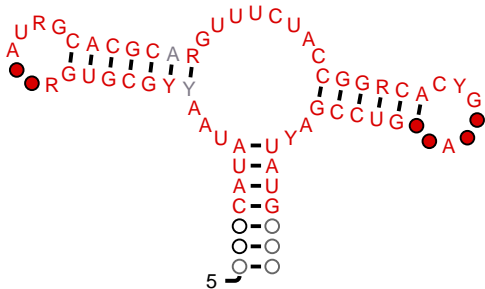

Supplement: supplementary_material [file 2xnw_A_1.cacofold.R2R.sto.pdf › supplemental_material/2xnw_A/R-scape/2xnw_A_1.cacofold.R2R.sto.pdf]

RF00167\_0\_66\_1

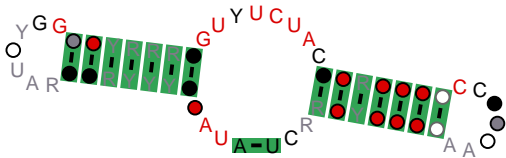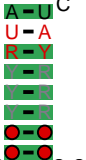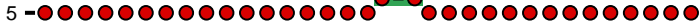

Supplement: supplementary_material [file RF00167_0_66_1.R2R.sto.pdf › supplemental_material/2xnw_A/R-scape/RF00167_0_66_1.R2R.sto.pdf]

RF00167\_0\_66\_1.cacofold

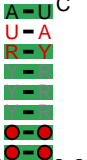

5 - 

Supplement: supplementary_material [file RF00167_0_66_1.cacofold.R2R.sto.pdf › supplemental_material/2xnw_A/R-scape/RF00167_0_66_1.cacofold.R2R.sto.pdf]

RF00167\_Purine

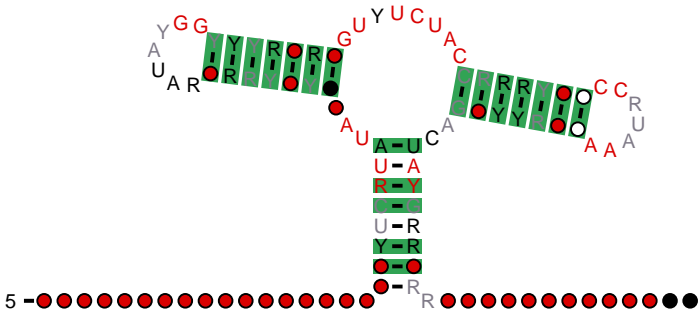

Supplement: supplementary_material [file RF00167_Purine.R2R.sto.pdf › supplemental_material/2xnw_A/R-scape/RF00167_Purine.R2R.sto.pdf]

# RF00167\_Purine.cacofold



Supplement: supplementary_material [file RF00167_Purine.cacofold.R2R.sto.pdf › supplemental_material/2xnw_A/R-scape/RF00167_Purine.cacofold.R2R.sto.pdf]

5ddp\_A\_1.cacofold

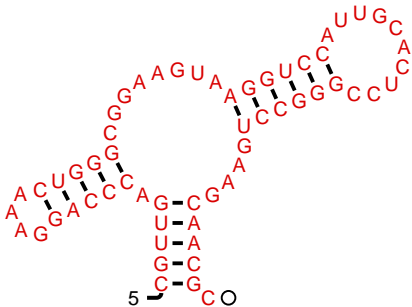

Supplement: supplementary_material [file 5ddp_A_1.cacofold.R2R.sto.pdf › supplemental_material/5ddp_A/R-scape/5ddp_A_1.cacofold.R2R.sto.pdf]

RF01739\_0\_60\_1

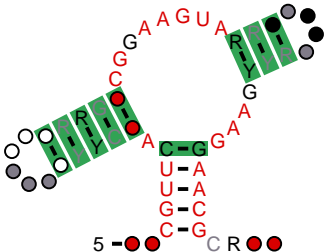

Supplement: supplementary_material [file RF01739_0_60_1.R2R.sto.pdf › supplemental_material/5ddp_A/R-scape/RF01739_0_60_1.R2R.sto.pdf]

# RF01739\_Glutamine

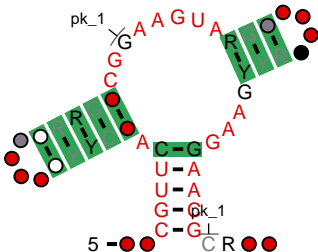

pk\_1

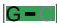

Supplement: supplementary_material [file RF01739_Glutamine.R2R.sto.pdf › supplemental_material/5ddp_A/R-scape/RF01739_Glutamine.R2R.sto.pdf]

# RF01739\_Glutamine.cacofold

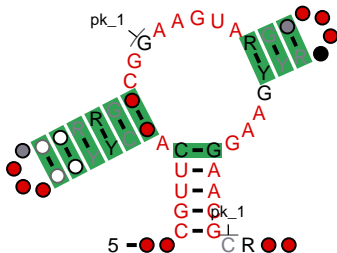

pk\_1

[G - C]

Supplement: supplementary_material [file RF01739_Glutamine.cacofold.R2R.sto.pdf › supplemental_material/5ddp_A/R-scape/RF01739_Glutamine.cacofold.R2R.sto.pdf]

tr\_1

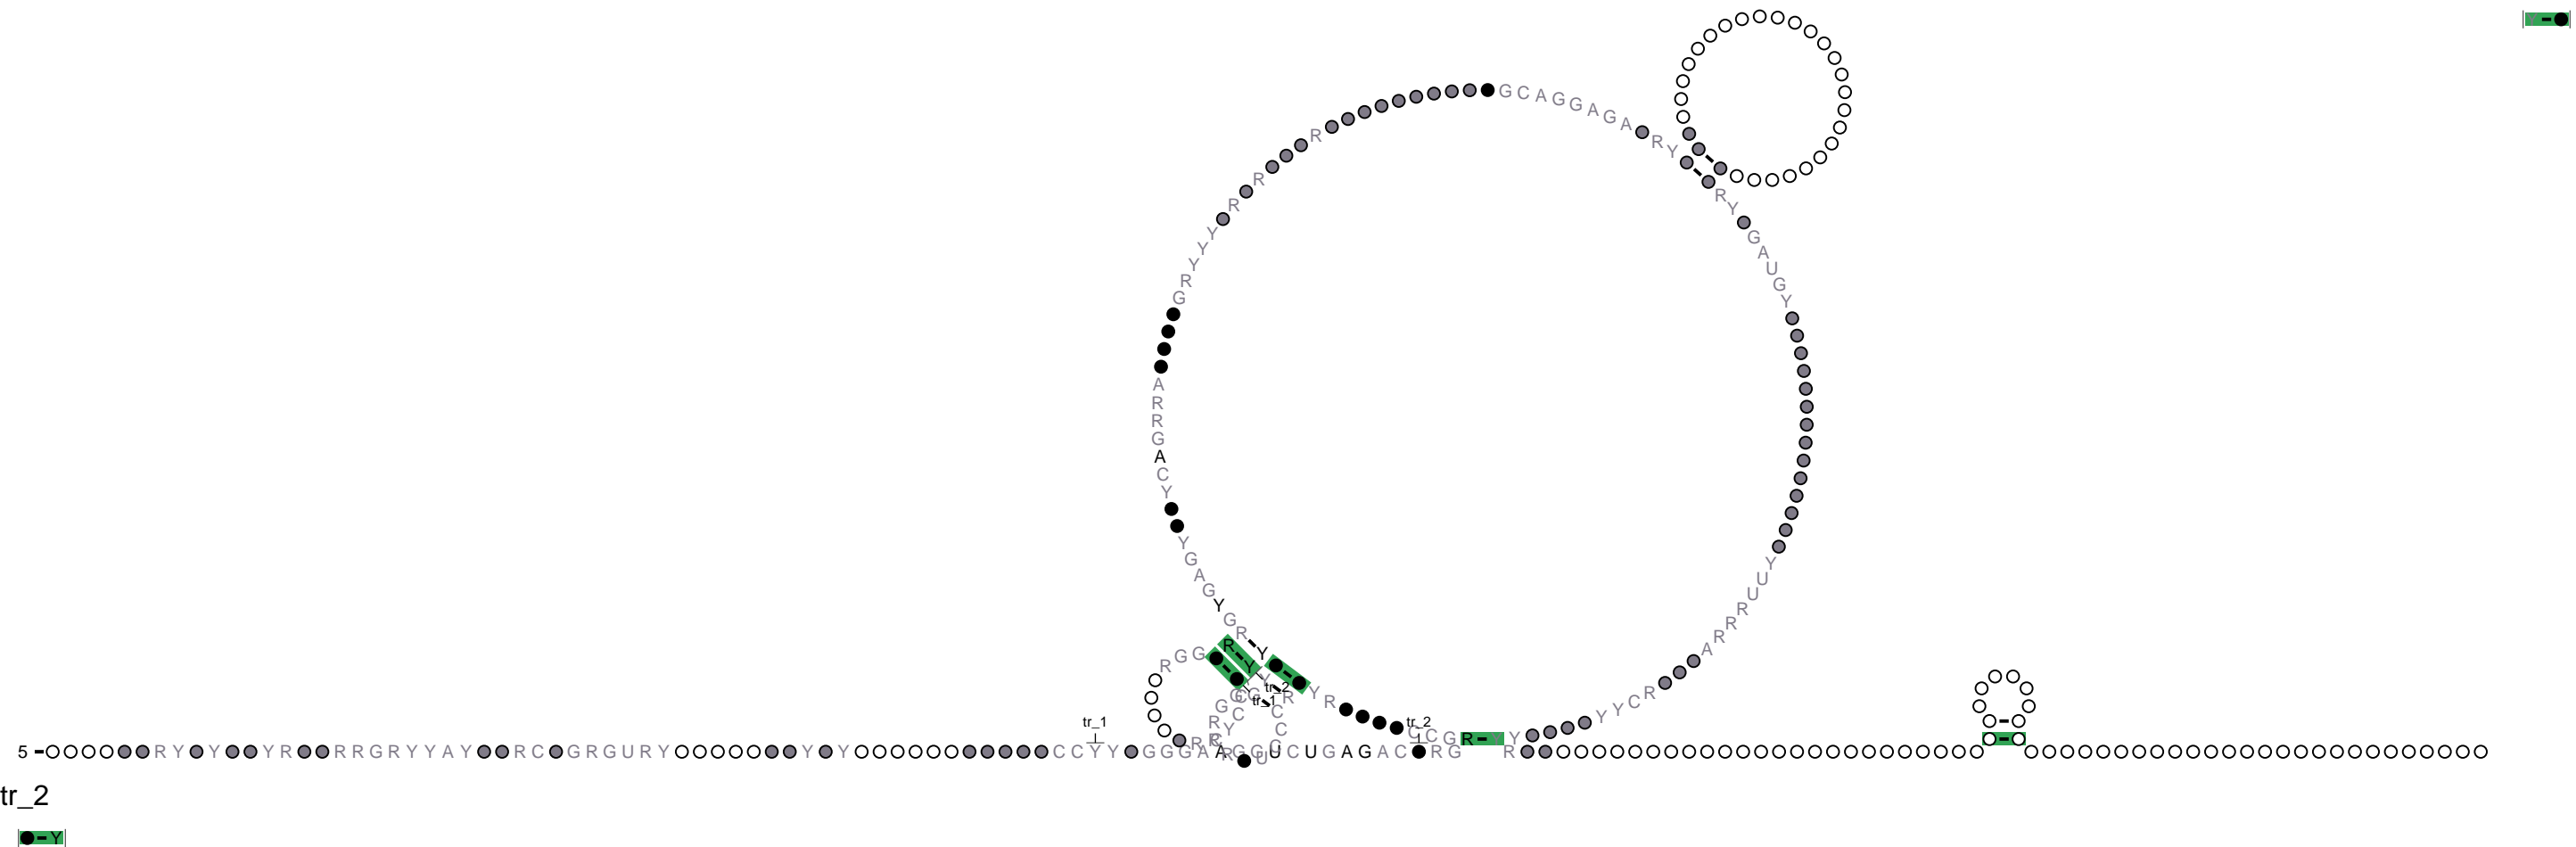

Supplement: supplementary_material [file 6ahr_A_1.cacofold.R2R.sto.pdf › supplemental_material/6ahr_A/R-scape/6ahr_A_1.cacofold.R2R.sto.pdf]

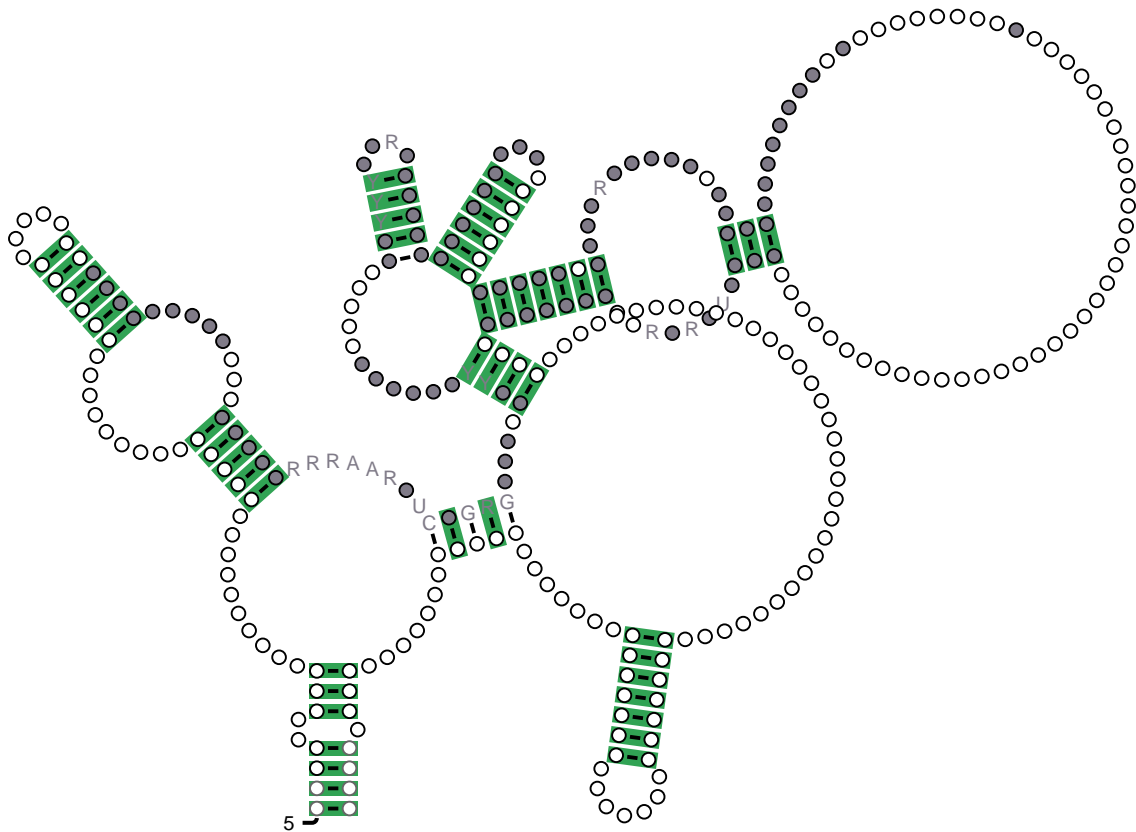

Supplement: supplementary_material [file RF00009_4_336.full_1.R2R.sto.pdf › supplemental_material/6ahr_A/R-scape/RF00009_4_336.full_1.R2R.sto.pdf]

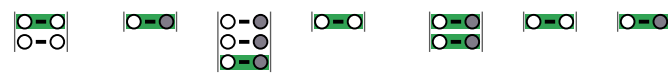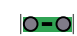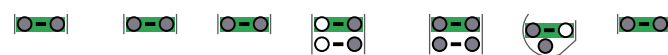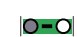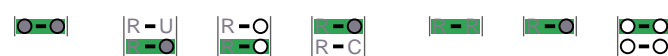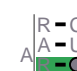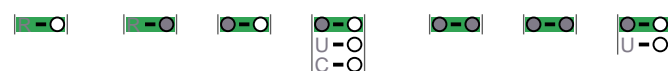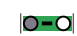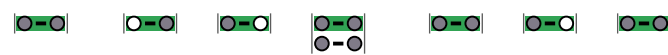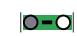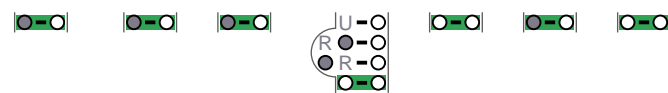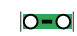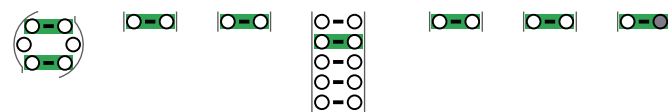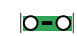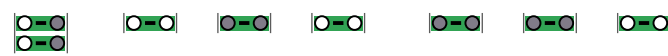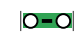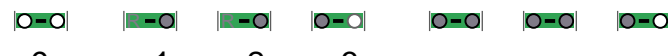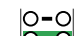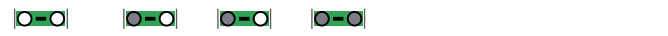

Supplement: supplementary_material [file RF00009_4_336.full_1.cacofold.R2R.sto.pdf › supplemental_material/6ahr_A/R-scape/RF00009_4_336.full_1.cacofold.R2R.sto.pdf]

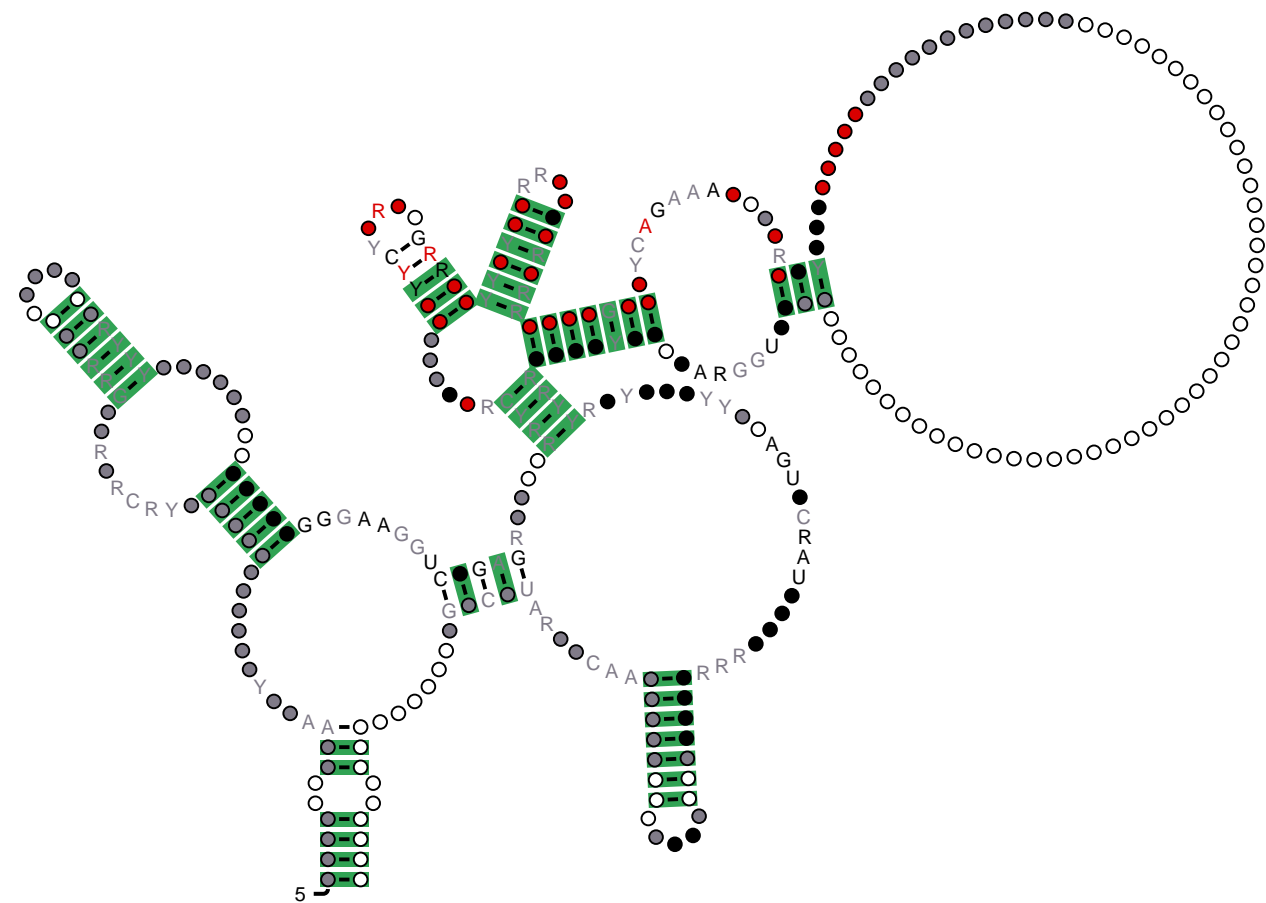

Supplement: supplementary_material [file RF00009_4_336.seed_1.R2R.sto.pdf › supplemental_material/6ahr_A/R-scape/RF00009_4_336.seed_1.R2R.sto.pdf]

RF00009\_4\_336.seed\_1.cacofold

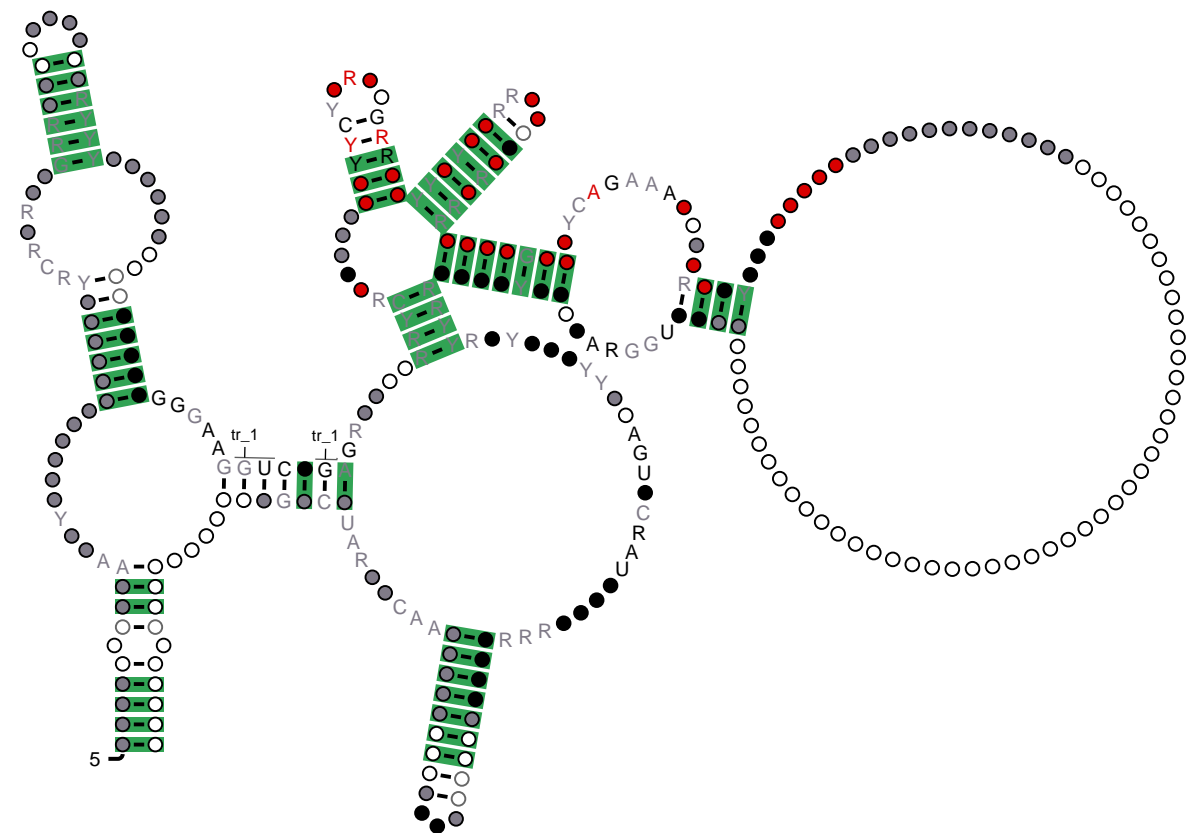

tr\_1

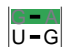

Supplement: supplementary_material [file RF00009_4_336.seed_1.cacofold.R2R.sto.pdf › supplemental_material/6ahr_A/R-scape/RF00009_4_336.seed_1.cacofold.R2R.sto.pdf]

RF00009\_4\_336\_1

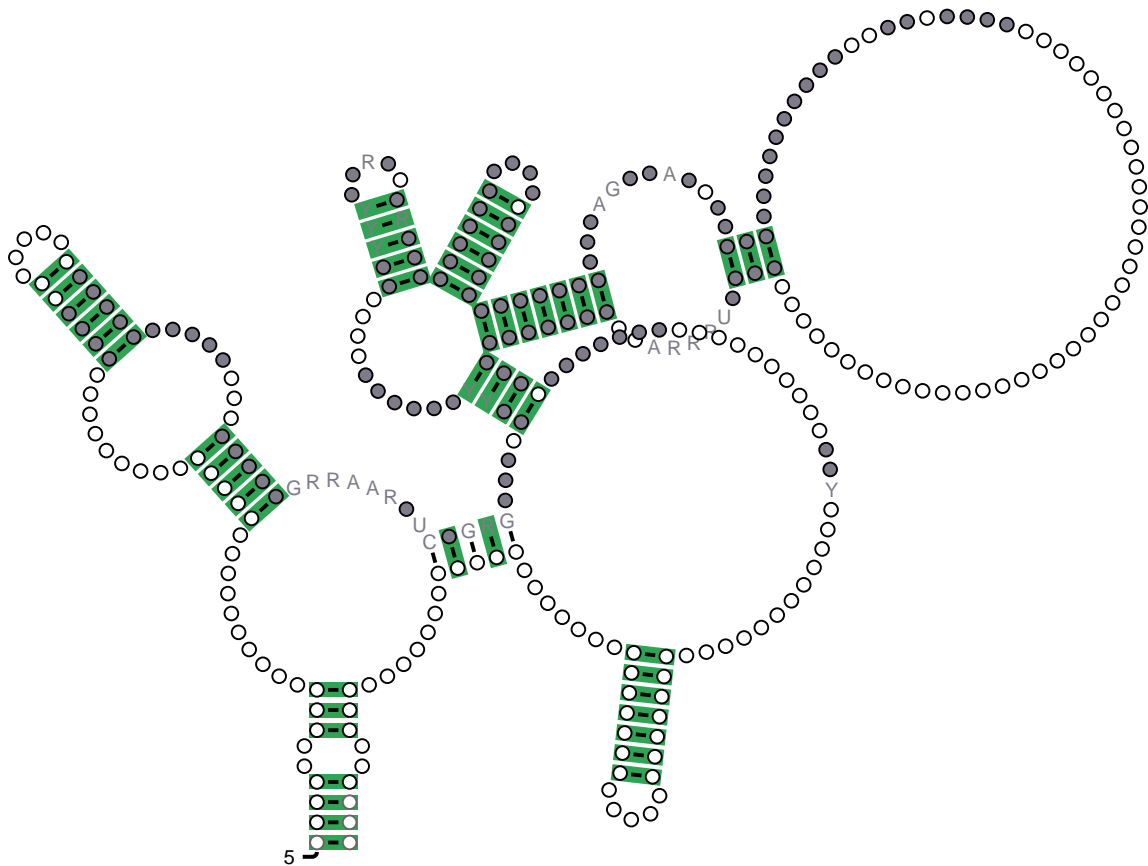

Supplement: supplementary_material [file RF00009_4_336_1.R2R.sto.pdf › supplemental_material/6ahr_A/R-scape/RF00009_4_336_1.R2R.sto.pdf]

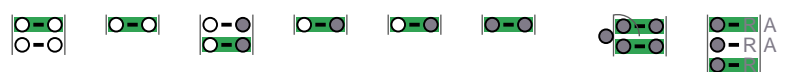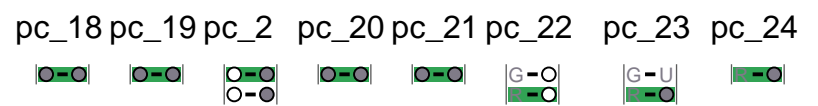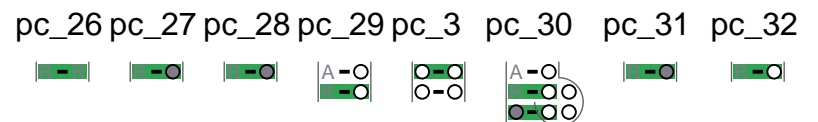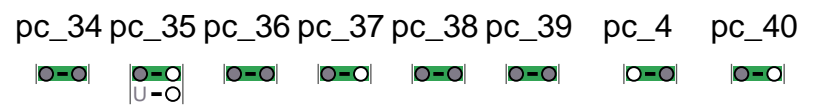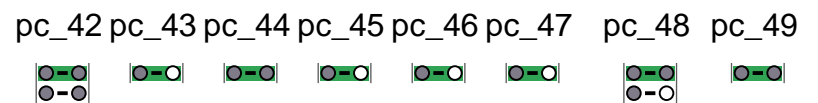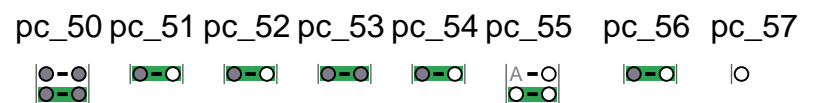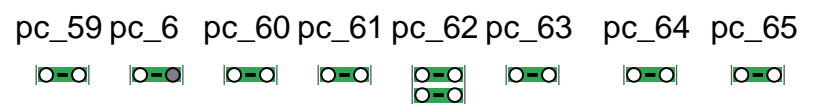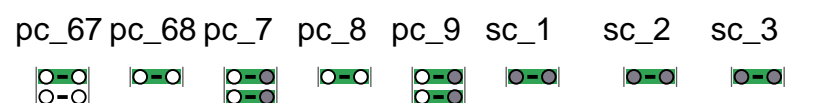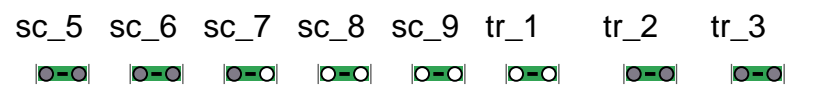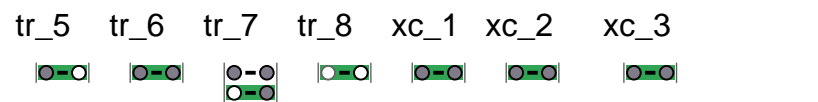

Supplement: supplementary_material [file RF00009_4_336_1.cacofold.R2R.sto.pdf › supplemental_material/6ahr_A/R-scape/RF00009_4_336_1.cacofold.R2R.sto.pdf]

# RF00009\_RNaseP\_nuc

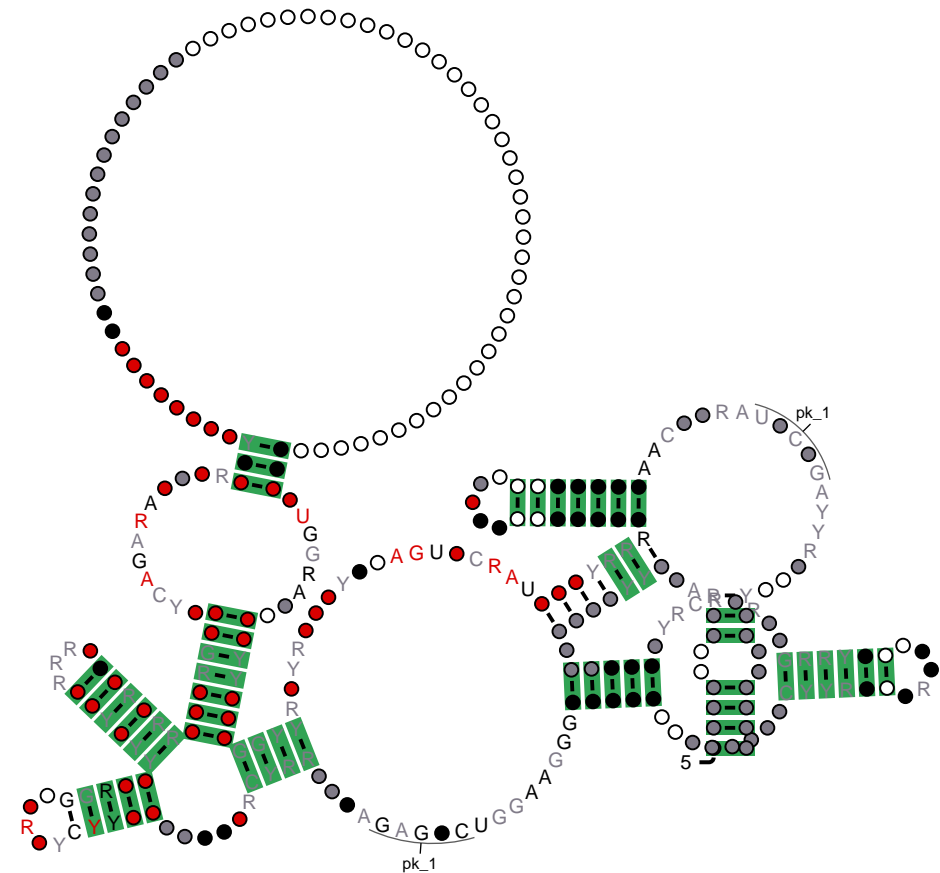

pk\_1

|   |   |   |
|---|---|---|
| C | - | G |
| G | - | C |
| A | - | U |
| U | - | A |

Supplement: supplementary_material [file RF00009_RNaseP_nuc.R2R.sto.pdf › supplemental_material/6ahr_A/R-scape/RF00009_RNaseP_nuc.R2R.sto.pdf]

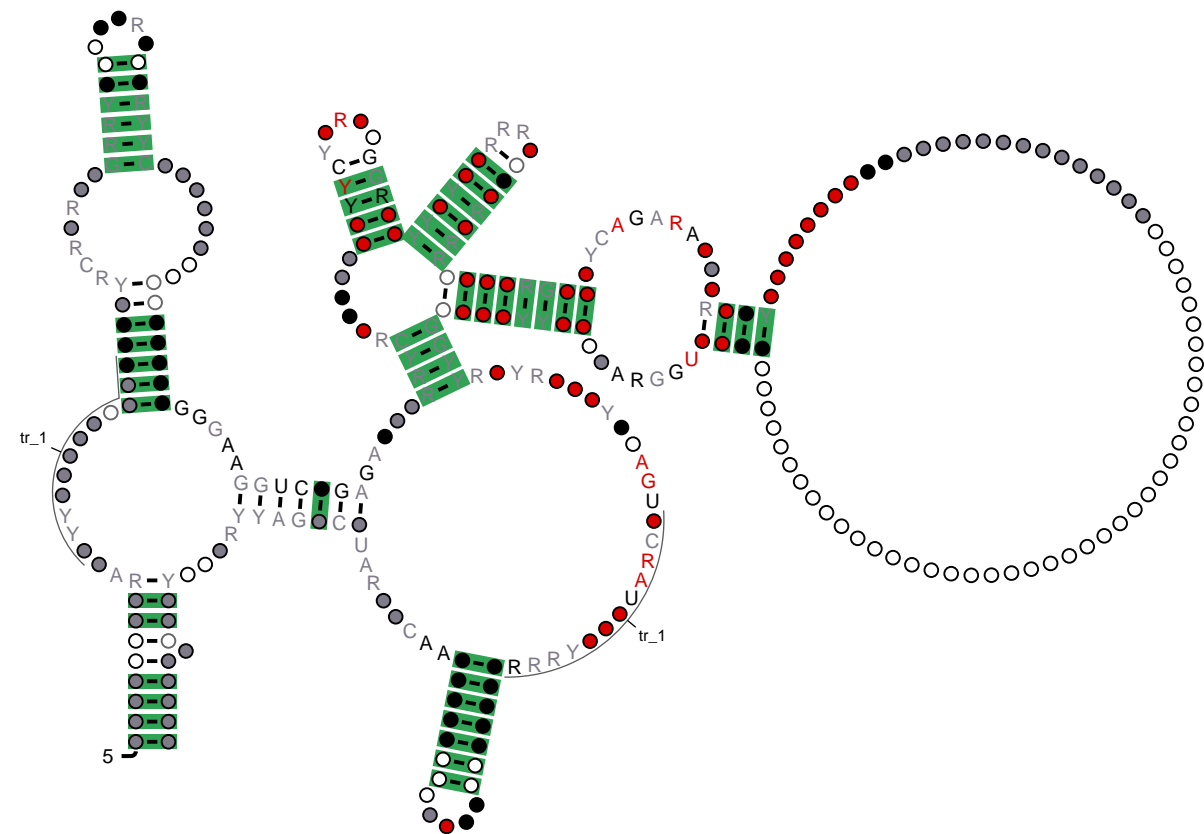

tr\_1

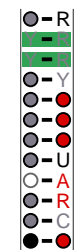

Supplement: supplementary_material [file RF00009_RNaseP_nuc.cacofold.R2R.sto.pdf › supplemental_material/6ahr_A/R-scape/RF00009_RNaseP_nuc.cacofold.R2R.sto.pdf]

6o9j\_A\_1.cacofold

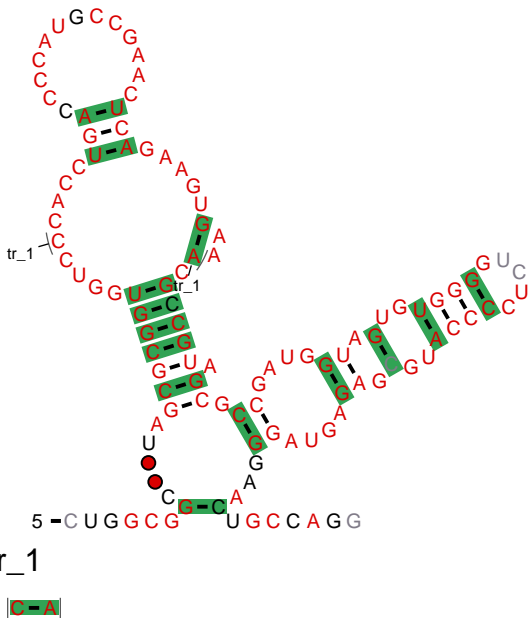

Supplement: supplementary_material [file 6o9j_A_1.cacofold.R2R.sto.pdf › supplemental_material/6o9j_A/R-scape/6o9j_A_1.cacofold.R2R.sto.pdf]

RF00001\_1\_116\_1

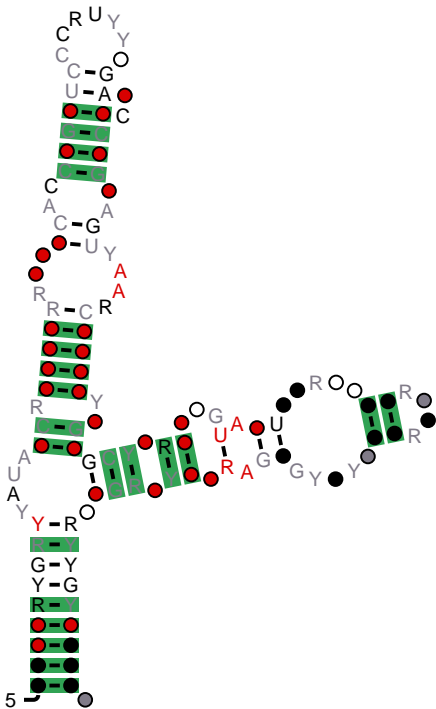

Supplement: supplementary_material [file RF00001_1_116_1.R2R.sto.pdf › supplemental_material/6o9j_A/R-scape/RF00001_1_116_1.R2R.sto.pdf]

RF00001\_1\_116\_1.cacofold

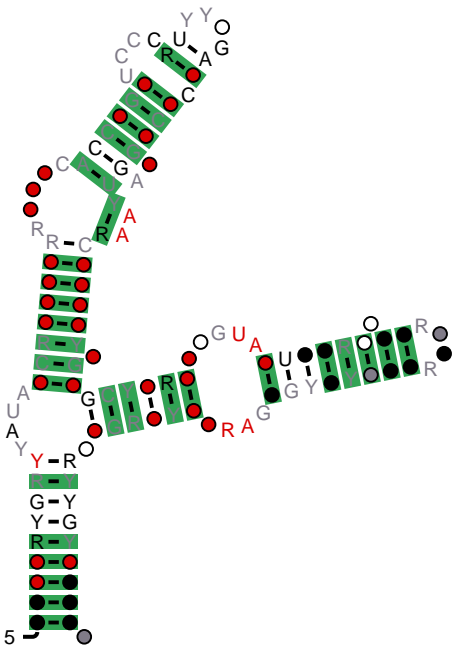

Supplement: supplementary_material [file RF00001_1_116_1.cacofold.R2R.sto.pdf › supplemental_material/6o9j_A/R-scape/RF00001_1_116_1.cacofold.R2R.sto.pdf]

# RF00001\_5S\_rRNA

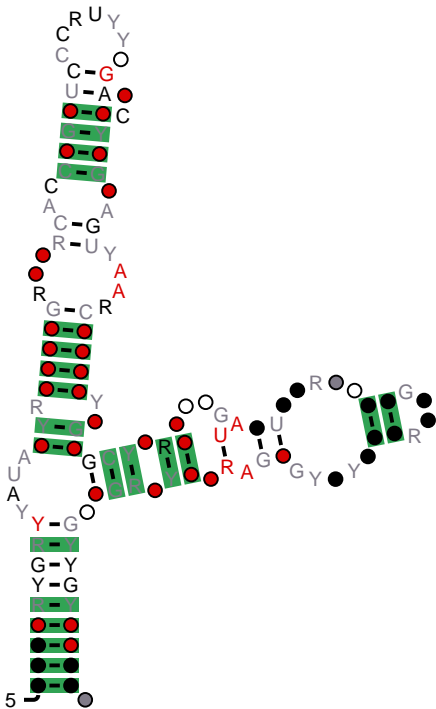

Supplement: supplementary_material [file RF00001_5S_rRNA.R2R.sto.pdf › supplemental_material/6o9j_A/R-scape/RF00001_5S_rRNA.R2R.sto.pdf]

## RF00001\_5S\_rRNA.cacofold

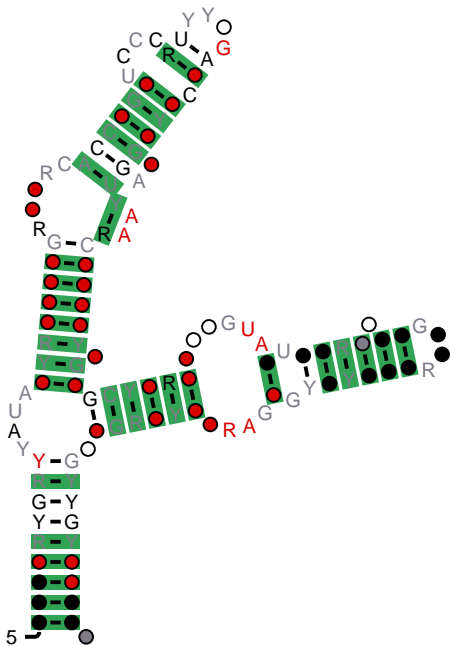

Supplement: supplementary_material [file RF00001_5S_rRNA.cacofold.R2R.sto.pdf › supplemental_material/6o9j_A/R-scape/RF00001_5S_rRNA.cacofold.R2R.sto.pdf]
